# Supplementary material
Source: Elsevier journal article supplement (https://www.sciencedirect.com/science/article/pii/S0301054618300089)
Supplement: mmc1 [file S0301054618300089:mmc1.doc]

# MODEL 1: ALLERGEN CONTROL PLAN FOR SCHOOLS WITH “INTERNAL FOOD SUPPLYING”

1. **The centre has an up-to-date list of students with allergies/intolerances who use the dining room, for each school grade** *(template list of allergic/intolerant students.1a-1b)*
2. **The plan for staff training and skills in food safety includes food allergens.** *(Append Training Plan)*.
3. **Description of the monitoring of raw materials and products received:**

We monitor the labels of packaged raw materials in order to detect possible allergens.

We ask suppliers for the up-to-date technical profile and/or report of allergens of raw materials bought in unpackaged or bulk form*. (Template register of raw materials. 2)*

1. **Description of measures taken to guarantee the separation and identification of raw materials in storage:**

To avoid possible cross-contamination, we store products destined for persons with allergies or intolerances in closed containers, upper shelves, or other (indicate) ----------------------------------------------------------------------------------------------------------------------------------------------

We store products in their original packaging, retaining all of their identifying data

We identify products stored in other receptacles with a specific label. (*Template Labels)*

Products in powder or liquid form (flour, sauces, etc.) are handled with care and are well sealed to avoid accidental spillages.

1. **Description of the preparation process**

The technical profile of each meal is available, and includes details of allergens *(Template technical profile of meals.3)*

The order of production is planned:

Menus without allergens are prepared first

Preparation is carried out in specific zones

Menus without allergens are prepared at the end of production after careful cleaning *(Append cleaning program)*

1. **Description of good handling practices for avoiding cross-contamination**

To avoid cross-contamination of work surfaces and utensils:

We use specific work surfaces and utensils.

Which ones?.......................................................................................................................................

.................................................................................................................................................

We work with the same utensils and surfaces at different times, and we have a specific cleaning protocol *(Append cleaning program).*

To avoid cross-contamination when seasoning food, we use salt/spice dispensers that avoid hand contact

To avoid contamination while frying:

We use a separate fryer

We use clean oil each time

To avoid contamination by latex:

We do not use gloves

We use vinyl or nitrile gloves

1. **Description of measures for preventing cross-contamination during preservation of prepared meals:**

Once the dish has been prepared

We keep it protected and identified

We do not store it in common warming cupboards or water baths, unless adequately protected

1. **Description of measures for preventing cross-contamination during food service**

We identify menus for allergic children and protect them during service *(template label)*

We have a system that ensures that special menus for allergic children reach their recipients without errors.

Describe...................................................................................................................................................................................................................................................................................................................................................................................................................................................................................................................................................................................................................................................................................................

1. **Description of incidents and corrective measures**

In cases where some aspect of our allergen plan is not complied with, we register this as an incident and describe the corrective measure adopted *(Template table of incidents and corrective measures .4)*

***School: Name and signature of the person***

***Proprietor responsible for managing the dining room:***

***Fiscal ID***

***Management company:***

***Fiscal ID: Date:***

**UPDATED LIST OF STUDENTS WITH ALLERGIES OR INTOLERANCES**

**GRADE**...........

| **GRADE** | **STUDENT** | **ALLERGY/INTOLERANCE** | **MEDICAL CERTIFICATE**  **YES NO** | **USES THE DINING ROOM**  **YES** |
| --- | --- | --- | --- | --- |
|  |  |  |  |  |
|  |  |  |  |  |
|  |  |  |  |  |
|  |  |  |  |  |
|  |  |  |  |  |
|  |  |  |  |  |
|  |  |  |  |  |
|  |  |  |  |  |
|  |  |  |  |  |
|  |  |  |  |  |

***Template Chart .1a (Copy for management)***

**UPDATED LIST OF STUDENTS WITH ALLERGIES OR INTOLERANCES WHO USE THE DINING ROOM**

**GRADE**...........

| **GRADE** | **STUDENT** | **ALLERGY/INTOLERANCE** | **MEDICAL CERTIFICATE**  **YES NO** | **PACKED LUNCH**  **YES** |
| --- | --- | --- | --- | --- |
|  |  |  |  |  |
|  |  |  |  |  |
|  |  |  |  |  |
|  |  |  |  |  |
|  |  |  |  |  |
|  |  |  |  |  |
|  |  |  |  |  |
|  |  |  |  |  |
|  |  |  |  |  |
|  |  |  |  |  |

***Template Chart .1b (Copy for the dining room kitchen****)*

#### ALLERGEN CONTROL CHART FOR RAW MATERIALS

| **PROVIDER:**  **Telephone:** | **PRODUCT:** | **Technical**  **profile** | **LABEL** | ALLERGENS DECLARED: | **DATE UPDATED** |
| --- | --- | --- | --- | --- | --- |
|  |  |  |  |  |  |
|  |  |  |  |  |  |
|  |  |  |  |  |  |
|  |  |  |  |  |  |
|  |  |  |  |  |  |
|  |  |  |  |  |  |
|  |  |  |  |  |  |
|  |  |  |  |  |  |

## Template Chart .2

**MEAL PREPARATION CHART**

**RECIPE NOT SUITABLE FOR INDIVIDUALS ALLERGIC/INTOLERANT TO:...................................**

**NAME OF DISH..................................**

| **INGREDIENTS** | **INGREDIENTS** |
| --- | --- |
|  |  |
|  |  |
|  |  |
|  |  |
|  |  |
|  |  |
|  |  |
|  |  |
|  |  |
|  |  |
|  |  |
|  |  |
|  |  |
|  |  |

| **Gluten** |  | **Celery and derivatives** |  |
| --- | --- | --- | --- |
| **Crustaceans and derivatives** |  | **Sesame seeds and derivatives** |  |
| **Eggs and derivatives** |  | **Lupin beans and derivatives** |  |
| **Fish and derivatives** |  | **Molluscs and derivatives** |  |
| **Nuts (pistachios, cashews**  **almonds, walnuts, etc) and derivatives** |  | **Sulphur dioxide and sulphites (>10mg/kg)** |  |
| **Soy and derivatives** |  |  |  |
| **Milk and derivatives** |  |  |  |
| **Peanuts** |  |  |  |
| **Mustard and derivatives** |  |  |  |

Mark allergens contained in ingredients

See product label or technical data sheet

BE AWARE OF COMPOUND INGREDIENTS

E.g. Ham may contain lactose and gluten

## Template Chart .3

**REGISTER OF INCIDENTS AND CORRECTIVE MEASURES:**

| **DATE** | **INCIDENT DETECTED (*)** | **CORRECTIVE MEASURE** | **PERSON RESPONSIBLE** |
| --- | --- | --- | --- |
|  |  |  |  |
|  |  |  |  |
|  |  |  |  |
|  |  |  |  |
|  |  |  |  |
|  |  |  |  |
|  |  |  |  |
|  |  |  |  |

In case of incidents in the receipt and/or delivery of food, specify the number of the delivery note, the product in question, and its supplier

## Template chart .4

.

***TRACKING LABELS FOR REPACKAGED PRODUCTS***

***(STORE)***

**PRODUCT:**

**INGREDIENTS:**

**ALLERGENS:**

**Expiry/best before date:**

**PRODUCT: MEATBALLS**

**INGREDIENTS: Minced beef and pork, salt**

**ALLERGENS: Wheatflour, egg, sulphites, soy**

**Expiry/best before date:22/12/12**

Example:

TRACKING LABELS FOR PREPARED FOOD FOR SPECIAL DIETS

**ALLERGY MENU:**

**STUDENT’S NAME:**

**GRADE:**
