# Supplementary material
Source: Elsevier journal article supplement (https://www.sciencedirect.com/science/article/pii/S0301054618300089)
Supplement: mmc2 [file S0301054618300089:mmc2.doc]

# MODEL 2: ALLERGEN CONTROL PLAN FOR SCHOOLS WITH “EXTERNAL FOOD SUPPLYING”

1. **The centre has an up-to-date list of students with allergies/intolerances who use the dining room, for each school grade** *(template list of allergic/intolerant students.1a-1b)*
2. **The plan for staff training and skills in food safety includes food allergens.** *(Append Training Plan).*
3. **Description of good handling practices for avoiding cross-contamination**

Specific service utensils are available.

The utensils themselves are cleaned carefully (*Append cleaning plan).*

To avoid cross-contamination when seasoning food, we use salt/spice dispensers that avoid hand contact

To avoid contamination by latex

We do not use gloves

We use vinyl or nitrile gloves

1. **Description of the delivery of foodstuffs:**

On arrival, we check that food is adequately protected, identified and separated from other foods.

1. **Description of measures for preventing cross-contamination during preservation of prepared meals:**

Once we have handled food prepared for children with food allergies:

We do not use the same oven or microwave oven to heat the food.

We use the same oven or microwave oven to heat the food, but with careful cleaning.

Other------------------------------------------------------------------------------------------------------------------------------------------------------------------------------------

We keep it protected and identified  We do not store it in common warming cupboards or water baths, unless adequately protected.

1. **Description of measures for preventing cross-contamination during food service**

We identify menus for allergic children and protect them during service *(template label)*

We have a system that ensures that special menus for allergic children reach their recipients without errors.

Describe............................................................................................................................................................................................................................................................................................................................................................................................................................................................................................................................................................................................................................................

1. **Description of incidents and corrective measures**

In cases where some aspect of our allergen plan is not complied with, we register this as an incident and describe the corrective measure adopted*(Template table of incidents and corrective measures .2)*

***School: Name and signature of the person***

***Proprietor responsible for managing the dining***

***Fiscal ID room***

***Food supply company:***

***Fiscal ID:***

***Date:***

***Company who manages the dining room:***

***Fiscal ID:***

##### UPDATED LIST OF STUDENTS WITH ALLERGIES OR INTOLERANCES

**GRADE**...........

| **GRADE** | **STUDENT** | **ALLERGY/INTOLERANCE** | **MEDICAL CERTIFICATE**  **YES NO** | **USES THE DINING ROOM**  **YES** |
| --- | --- | --- | --- | --- |
|  |  |  |  |  |
|  |  |  |  |  |
|  |  |  |  |  |
|  |  |  |  |  |
|  |  |  |  |  |
|  |  |  |  |  |
|  |  |  |  |  |
|  |  |  |  |  |
|  |  |  |  |  |
|  |  |  |  |  |

***Template Chart .1a (Copy for management)***

##### UPDATED LIST OF STUDENTS WITH ALLERGIES OR INTOLERANCES WHO USE THE DINING ROOM

**GRADE**...........

| **GRADE** | **STUDENT** | **ALLERGY/INTOLERANCE** | **MEDICAL CERTIFICATE**  **YES NO** | **PACKED LUNCH**  **YES** |
| --- | --- | --- | --- | --- |
|  |  |  |  |  |
|  |  |  |  |  |
|  |  |  |  |  |
|  |  |  |  |  |
|  |  |  |  |  |
|  |  |  |  |  |
|  |  |  |  |  |
|  |  |  |  |  |
|  |  |  |  |  |
|  |  |  |  |  |

***Template Chart .1b (Copy for the dining room kitchen****)*

**REGISTER OF INCIDENTS AND CORRECTIVE MEASURES:**

| **DATE** | **INCIDENT DETECTED (*)** | **CORRECTIVE MEASURE** | **PERSON RESPONSIBLE** |
| --- | --- | --- | --- |
|  |  |  |  |
|  |  |  |  |
|  |  |  |  |
|  |  |  |  |
|  |  |  |  |
|  |  |  |  |
|  |  |  |  |
|  |  |  |  |

In case of incidents in the receipt and/or delivery of food, specify the number of the delivery note, the product in question, and its supplier

***Template Chart .2***

**TRACKING LABELS FOR PREPARED FOOD FOR SPECIAL DIETS**

**ALLERGY MENU:**

**STUDENT’S NAME:**

**GRADE:**

**ALLERGY MENU:**

**STUDENT’S NAME:**

**GRADE:**

**ALLERGY MENU:**

**STUDENT’S NAME:**

**GRADE:**

**ALLERGY MENU:**

**STUDENT’S NAME:**

**GRADE:**
