# Supplementary material
Source: Elsevier journal article supplement (https://www.sciencedirect.com/science/article/pii/S0301054618300089)
Supplement: mmc3 [file S0301054618300089:mmc3.pdf]

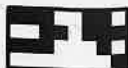

14306

**CUESTIONARIO DE EVALUACIÓN ALERGIAS/INTOLERANCIAS ALIMENTARIAS  
EN LAS COCINAS-SERVICIOS DE COMEDORES ESCOLARES**

**C S B** Consorci Sanitari de Barcelona

**Agència  
de Salut Pública**

SICAL: | | | | |

FECHA: . / /2015

Nombre del  
centro[illegible]

GESTIÓN ☒ EXT ☐ INT

SUMINISTRO: EXT ☐ INT ☐

CAMBIO GESTORA: ☐ SI ☒ NO NPE

Nombre empresa gestora

[illegible]

## A. CENSO

1. Nº de alumnos que utilizan servicio de comedor del centro en el curso 2014-15:

2. Nº de alumnos con alergias/intolerancias alimentarias en el centro que se quedan a comer

2.a Nº de alumnos de nivel educativo guardería (0-3 años):

2.b Nº de alumnos de nivel educativo Infantil (3-6 años):

2.c Nº de alumnos de nivel educativo Primaria (6-12 años):

2.d Nº de alumnos de nivel educativo Secundaria y Bachillerato (12-18 años):

## B. Nº. MENÚS POR ALERGIAS/INTOLERANCIAS SERVIDAS:

3. Tipos de menús adaptados a:

3.a Intolerancia al gluten (enfermedad celíaca)

3.b Intolerancia a la lactosa y/ o azúcares

3.c Alergia a la leche y derivados (incluye lactosa)

3.d Alergia al pescado y productos a base de pescado

3.e Alergia a los huevos y productos a base de huevo

3.f Alergia al cacahuete y productos a base de cacahuete

3.g Alergia a frutos secos de cáscara (almendras, avellanas, nueces anacardos, nueces pecanas, nueces de Brasil, pistachos, macadamias y sus derivados)

3.h Alergia al apio

3.i Alergia a frutas rosáceas, tropicales y cítricas (melocotón, kiwi, piña,

fresones,

3.j Alergia a la soja

3.k Alergia a las leguminosas: garbanzos, lentejas, judías,...

3.l Alergia a sulfitos y aditivos

3.m Alergia a moluscos y crustáceos

3.n Alergia a los altramuces

3.o Alergia a la mostaza

4. ¿Cuántos alumnos son poli alérgicos? (alérgicos a más de un alimento)

\_\_\_\_\_

C. COORDINACIÓN Y CIRCUITOS DE COMUNICACIÓN EN ALERGIAS ALIMENTARIAS

5. ¿Existe un canal de comunicación y coordinación directo entre las familias afectadas por alergias/intolerancias alimentarias y el servicio de cocina/comedor?

☐ Sí ☐ No

6. ¿Conoce la legislación vigente en alergias/intolerancias alimentarias??

☐ Sí ☐ No

6. a ¿Cuál??

\_\_\_\_\_

7. ¿Conoce que alérgenos ocultos pueden haber en los alimentos elaborados?

☐ Sí ☐ No

7. a ¿Cuales?

\_\_\_\_\_

D. DISEÑO DE MENUS

8. ¿Tienen una planificación escrita (diaria, semanal o mensual) del tipo de dietas especiales por alergias/intolerancias alimentarias que tiene que servir?

☐ Sí ☐ No

9. ¿Hay niños con alergias/intolerancias alimentarias que traigan la comida elaborada de casa?

☐ Sí ☐ No

9. a ¿Cuántos?

\_\_\_\_\_

10. En la elaboración de las dietas especiales:

☐ Se substituye o se elimina el ingrediente alergógeno

☐ Se diseña un menú diferente

### E. INSTALACIONES, EQUIPOS Y UTENSILIOS

11. ¿Disponen de alguna zona de trabajo específica para la elaboración de menús para alergias/intolerancias alimentarias? ☐ Sí ☐ No ☐ NP

\*NP: No procede para los centros que no elaboren los menús

12. ¿Disponen de recipientes tapados herméticos para contener menús elaborados sin alérgenos? (tanto si elaboran como si reciben los menús) ☐ Sí ☐ No

13. ¿Disponen de utensilios (ollas, cazuelas, paellas, cuchillos, teflón, cucharones, tenedores, cucharas... ) de cocina específicos para elaborar los menús específicos de alergias/intolerancias alimentarias? ☐ Sí ☐ No ☐ NP

\*NP: No procede para los centros que no elaboren los menús

14. Disponen de microondas de uso exclusivo para poder recalentar los menús elaborados en casa para los niños alérgicos? ☐ ☐ ☐

\*NP: No procede para los centros que no tienen comensales que traigan fiambreras de casa

15. En caso de transportar menús elaborados a otra escuela o a vuestra guardería, ¿disponen de recipientes tapados herméticos para el transporte de menús exentos de alérgenos?? ☐ Sí ☐ No ☐ NP

\*NP: No procede para los centros que no transportan comidas

### F. HIGIENE DEL PROCESO

16. ¿Se comprueba la lista de ingredientes que figura en la etiqueta de las materias primas? ☐ Sí ☐ No ☐ NP

\*NP: No procede para los centros que no elaboren los menús

16.a. ¿Cada cuánto?

- ☐ En cada uso del producto  
☐ Cuando es un nuevo producto  
☐ Cuando el proveedor comunica cambio de formulación  
☐ Otros

17. ¿Están identificados correctamente los ingredientes alérgenos cuando se recibe la materia prima? ☐ Sí ☐ No ☐ NP

\*NP: No procede para los centros que no transportan comidas

18. Disponen de zona específica o recipientes tapados herméticos para el almacenaje de las materias primas no alergógenas?

☐ Sí ☐ No ☐ NP

\*NP: No procede para los centros que no elaboren los menús

19. ¿La comida elaborada en otra cocina lleva la información de los alérgenos que contiene?

☐ Sí ☐ No ☐ NP

\*NP: No procede para los centros que no elaboren los menús

## F.2. MANIPULACIÓN

20. ¿Se utilizan guantes para la manipulación de alimentos?

☐ Sí ☐ No

20.a Si se da el caso, ¿de qué material son?

☐ Látex ☐ Vinilo ☐ Nitrilo ☐ Otros

21. ¿Cómo se asegura que no haya posibilidad de contaminación cruzada durante la elaboración de los diferentes menús?

☐ Usando superficies o zonas de trabajo diferentes

☐ Mismas superficies pero horarios diferentes con limpieza previa

22. ¿Se usa aceite y freidora independiente para elaborar menús especiales exentos de alergógenos?

☐ Sí ☐ No ☐ NP

\*NP: No procede para los centros que no elaboren los menús

23. ¿Para los envases de condimentos (tipo saleros, especias...) se utilizan pots que no se tenga que introducir la mano?

☐ Sí ☐ No ☐ NP

\*NP: No procede para los centros que no elaboren los menús

### G. SERVICIO

24. ¿Hay un protocolo de Buenas prácticas higiénicas para los monitores/as del comedor respecto a los alumnos alérgicos? ☐ Sí ☐ No
25. ¿Se usan utensilios exclusivos para servir los menús exentos de alérgenos en el comedor? ☐ Sí ☐ No ☐ NP
26. ¿Se valora la colocación en el comedor del niño alérgico/intolerante? ☐ Sí ☐ No
27. ¿Se aplica alguna medida preventiva en el comedor para que el menú especial llegue al alumno alérgico sin errores? ☐ Sí ☐ No

27.a. ¿Cual?

- ☐ Se sientan los alumnos alérgicos siempre en el mismo sitio
- ☐ Ponén el nombre del alumno o enfermedad en la mesa
- ☐ Disponen de platos de colores diferentes
- ☐ Fotografía con el nombre y alergia del alumno
- ☐ Los alumnos con AIAs llevan una identificación
- ☐ Otros

### H. AUTOCONTROLES

28. ¿Disponen de un Pla de Control de alergias alimentarias? ☐ Sí ☐ No
29. ¿Disponen de un recetario estandarizado donde consten todos los ingredientes utilizados en cada plato? ☐ Sí ☐ No
30. ¿En el recetario también se incluy en los menús para los alumnos alérgicos? ☐ Sí ☐ No
31. Disponen de un Plan de Formación que contemple los alérgenos? ☐ Sí ☐ No
